# Supplementary material for: In silico rational design and functional analysis of novel glucose-insensitive sugar transporters from Trichoderma reesei
Source: Research Square preprint supplement (doi:10.21203/rs.3.rs-7489241/v1), 2025-09-10
Supplement: Supplementary file 1 [file 4970dffcf23663578437b388.docx]

Supplementary File

S1:

**Table S1 –** Oligonucleotides used to verify the gene expression of candidate sugar transporters

| **Oligonucleotides** | **Sequences (5’-3’)** |
| --- | --- |
| **F – 56684**  **R – 56684** | CACAACCCTCTCTATGCTGATG  GGGCACGATATTTGGGATATGA |
| **F – 50894**  **R – 50894** | GGCGGTGTCTTGTATGGTTAC  ATCGTATTCTCCCATGTGCTG |
| **F – 69563**  **R – 69563** | CGGTCACAGCACAGATAACA  TATCCAGAGTGTCCCAGATGTA |
| **F – 56289**  **R – 56289** | CTGTAGCCCTCAACTTCATCTC  ACCCAAGATGGGTAGCAAAG |
| **F – 59333**  **R – 59333** | GTTCCTCGTCGAAGGCTTAAT  CGATCTGTGAACCATCCCTAAG |
| **F – 67541**  **R – 67541** | GCATTGGCTGCGTTCTTATC  GTTGCCAGAATGCCAATGAG |
| **F – 80058**  **R – 80058** | CGGCTCGTGACACGTATTAT  CGGTTCCTCGGAATAGTAAACA |
| **F – 54632**  **R – 54632** | TTTCTGCATGGGTTCTGGG  TCTACCTTGGTCGCAATTCTC |
| **F – 69712**  **R – 69712** | GACTCAGTGAAGCCTGCATAG  AGTTGCCGATAGACCACATAAC |
| **F – 121482**  **R – 121482** | CTGCTGAGAAACCGACCTTTA  AACAAGGGCAGGAACAATCT |
| **F – 104816**  **R – 104816** | TTGGCGGATTCTTGGATTT  TCCGAGGAAGAGGATGAAGA |
| **F – 3532**  **R – 3532** | GGCTTCTCTGCCGACATTAT  TCGCAGCAAAGGATATGTAAGA |
| **F – 82309**  **R – 82309** | GCAGAGCTACTTCTCCATGTT  CGCAATACCGATCCACTCTT |
| **F – 104320**  **R – 104320** | AACCTAGCCTCCCTACTCTTC  AAAGCGGCGATCCAAGTATAG |
| **F – 78833**  **R – 78833** | GCTCCT ACG TCTTCTTCAACTT  GCATTGGTAATCTCGGGTATCT |
| **F – 105260**  **R – 105260** | CAGCAGTTCTCCGGAATCAA  ACGAGTCCGAATCCCATAGA |
| **F – 21595**  **R – 21595** | GGACAGCCACCAGAACTTT  GTACACGACGGAGAGGTAGAT |
| **F – 22912**  **R – 22912** | TGGTCGGATGTATCATTTGGG  GGACCTGAGCAGATTCGATAC |
| **F – 68812**  **R – 68812** | CTTCTTCGCTGCTCACTTCT  TTGGCACCCATACAAATACC |
| **F – 76897**  **R – 76897** | TTGTCGTCCATCGGCTAAAG  CCAGACTTGCCAGTCAGTAAA |
| **F – 70830**  **R – 70830** | CTCACTGTACATCCTGGGATT  CCGTGCCTATCGAGAACAAT |
| **F – 5000**  **R – 5000** | ATTGCCGGTATGAGCAAAGA  CCAATCTTGCGGATGAGGAT |
| **F – 65915**  **R – 65915** | GCTCTTTATGCTGCCGACTA  GACAAAGGAGGCTTGGTATGA |
| **F – 69901**  **R – 69901** | TGACGAGCTCTTTGCTACTG  CTTCCCTTTGTCTGCCTCTT |
| **F – 62380**  **R – 62380** | CGCCCTCATCATCTACTTCTTC  GGAACCCATTTGGAGCTCTT |
| **F – 75165**  **R – 75165** | ATGAAGCAACCAGACCACTC  TGTAGGTCGCGCATTGTT |
| **F – 111888**  **R – 111888** | ATGGCTTCCGTGGTATGTTC  GCTGAGTCAAGTTGGCTACTA |
| **F – 6005**  **R – 6005** | GAGGAGAGGAGACTGGTTAGAA  AGATGGCACGGTTGATGTT |
| **F – 106330**  **R – 106330** | CCTGTACATTGTGGGCATCT  CGACGCAGCCCATAGATAAA |
| **F – 65583**  **R – 65583** | CTTCTTTGCGGGCTTCTTTG  GACTGGTCCCATTAATCCAGTAG |

S2:

**Table S2 –** Oligonucleotides and sequences used for amplification of fragments with Tr62380 mutations, wild ORFs of Tr62380 and Tr82309, and ORFs for fusion of transporters with GFP

| Oligonucleotides | Sequências (5’-3’) |
| --- | --- |
| FWD_Tr62380_p416GPD | TTAGTTTCGACGGATTCTAGAACTAGTATGACCGTTACCTTCGACCAGCATG |
| REV_Tr62380_p416GPD | CGAATTCCTGCAGCCCGGGGGATCCTTAGACATGCTCCTCGTGAGAAGGAG |
| FWD_62380_GGFIMG | GGGTGGATTTATCATGGGTTACGACACTGG |
| REV_62380_GGFIMG | CCAGTGTCGTAACCCATGATAAATCCACCC |
| FWD_62380_S119E | ATTGGTCGCAGGCCCGAAATCTCGTT |
| REV_62380_S119E | AACGAGATTTCGGGCCTGCGACCAAT |
| FWD_Tr62380_p416GPD_GFP | TCTAGAACTAGTGGATCCCCCAGGGCTGCAGGATGACCGTTACCTTCGACC |
| REV_Tr62380_GFP | TGGGACAACACCAGTGAATAATTCTTCACCTTTAGACATGACATGCTCCTCGTGAGAAG |
| FWD_Tr82309_p416GPD | TTAGTTTCGACGGATTCTAGAACTAGTATGACCGTCCTCACCTCACCTCT |
| REV_Tr82309_p416GPD | AATTCCTGCAGCCCGGGGGATCCCTACTCCTTTGGCTCGGCAACTT |
| FWD_Tr82309_p416GPD_GFP | TCTAGAACTAGTGGATCCCCCAGGGCTGCAGGATGACCGTCCTCACCTCAC’ |
| REV_Tr82309_GFP | TGGGACAACACCAGTGAATAATTCTTCACCTTTAGACATCTCCTTTGGCTCGGCAAC |
| FWD_GFP_p416GPD | ATGTCTAAAGGTGAAGAATTATTCACTG |
| REV_GFP_p416GPD | TTATTTGTACAATTCATCCATACCATG |

S3:

**Table S3 –** Oligonucleotides and sequences used to confirm the transformation of Tr62380_WT, and its mutants, and Tr82309_WT

| Oligonucleotides | Sequences |
| --- | --- |
| FWD_Tr62380_p416GPD | GTCTTGGGCTTTGGCATCTT |
| REV_Tr62380_p416GPD | CGAATTCCTGCAGCCCGGGGGATCCTTAGACATGCTCCTCGTGAGAAGGAG |
| FWD_Tr82309_p416GPD | TTAGTTTCGACGGATTCTAGAACTAGTATGACCGTCCTCACCTCACCTCT |
| REV_Tr82309_p416GPD | AATTCCTGCAGCCCGGGGGATCCCTACTCCTTTGGCTCGGCAACTT |

S4:


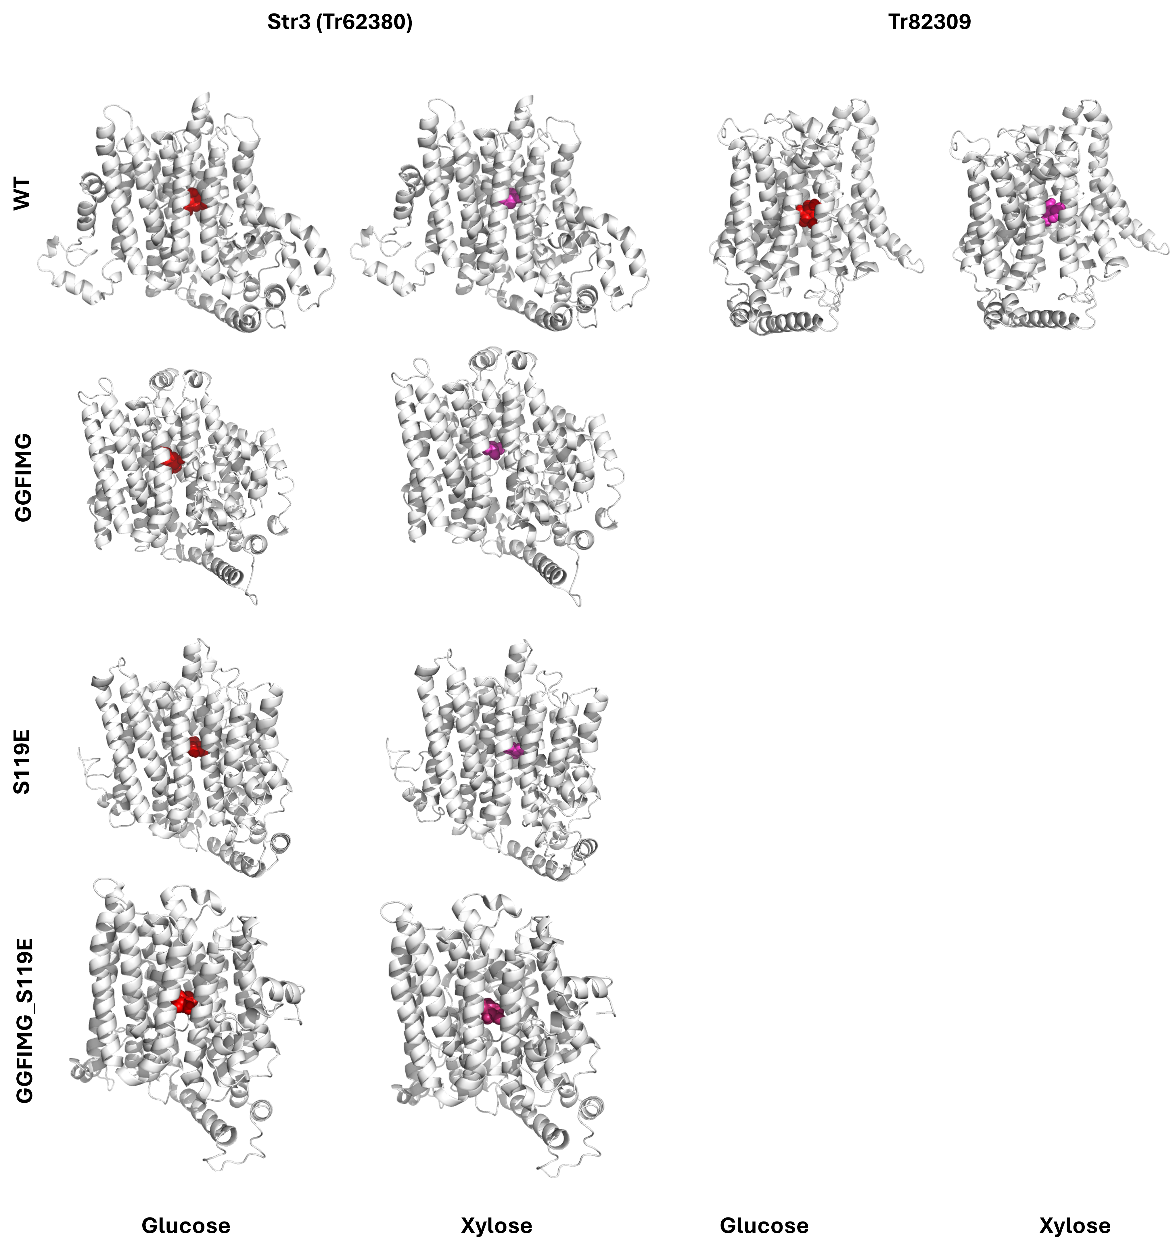


Figure S4 – Three-dimensional models of Str3 (Tr62380)_WT and its mutants, from Tr82309_WT, docked with glucose (red) and xylose (purple).

S5:


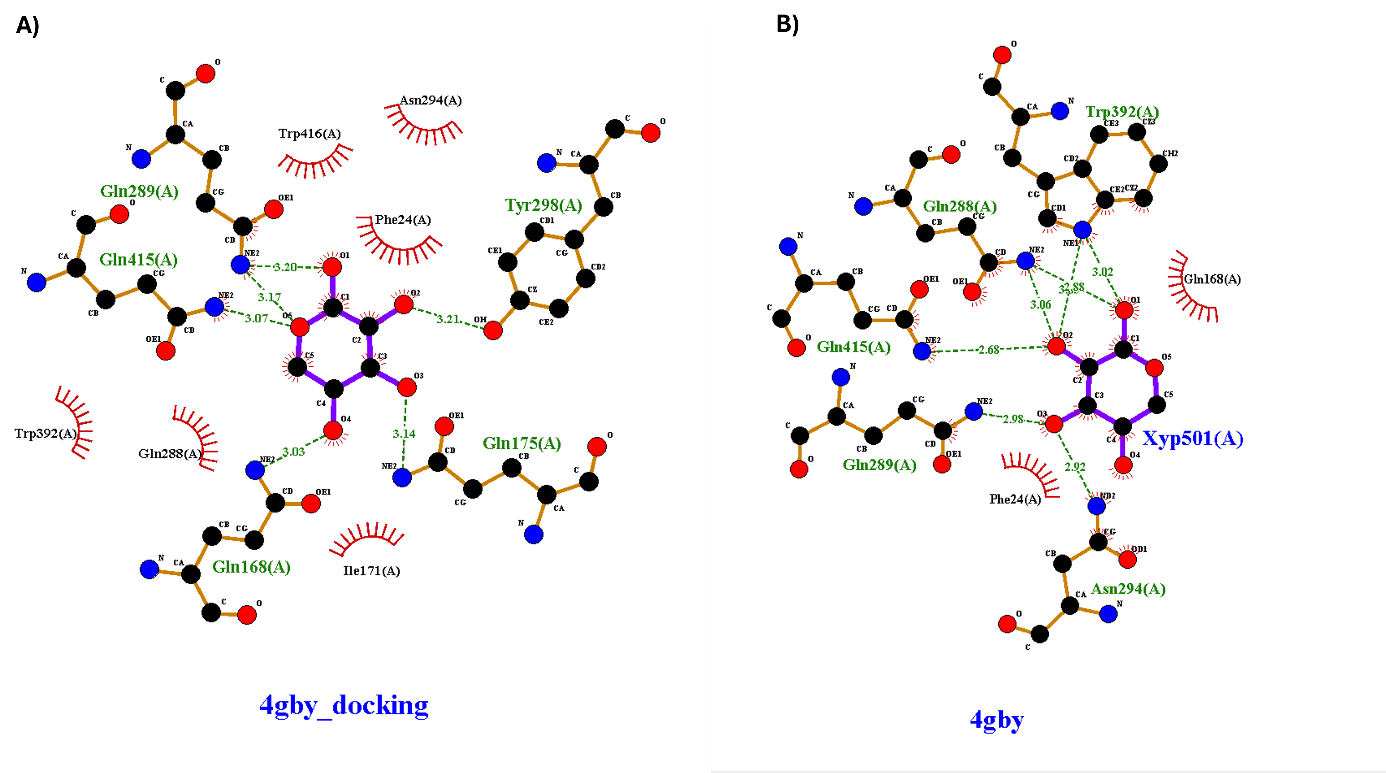


Figure S5 – Docking validation. A) Interactions between 4GBY and xylose from the mobile docking. B) Interactions between 4GBY and xylose from the file deposited in the PDB.

S6:

**
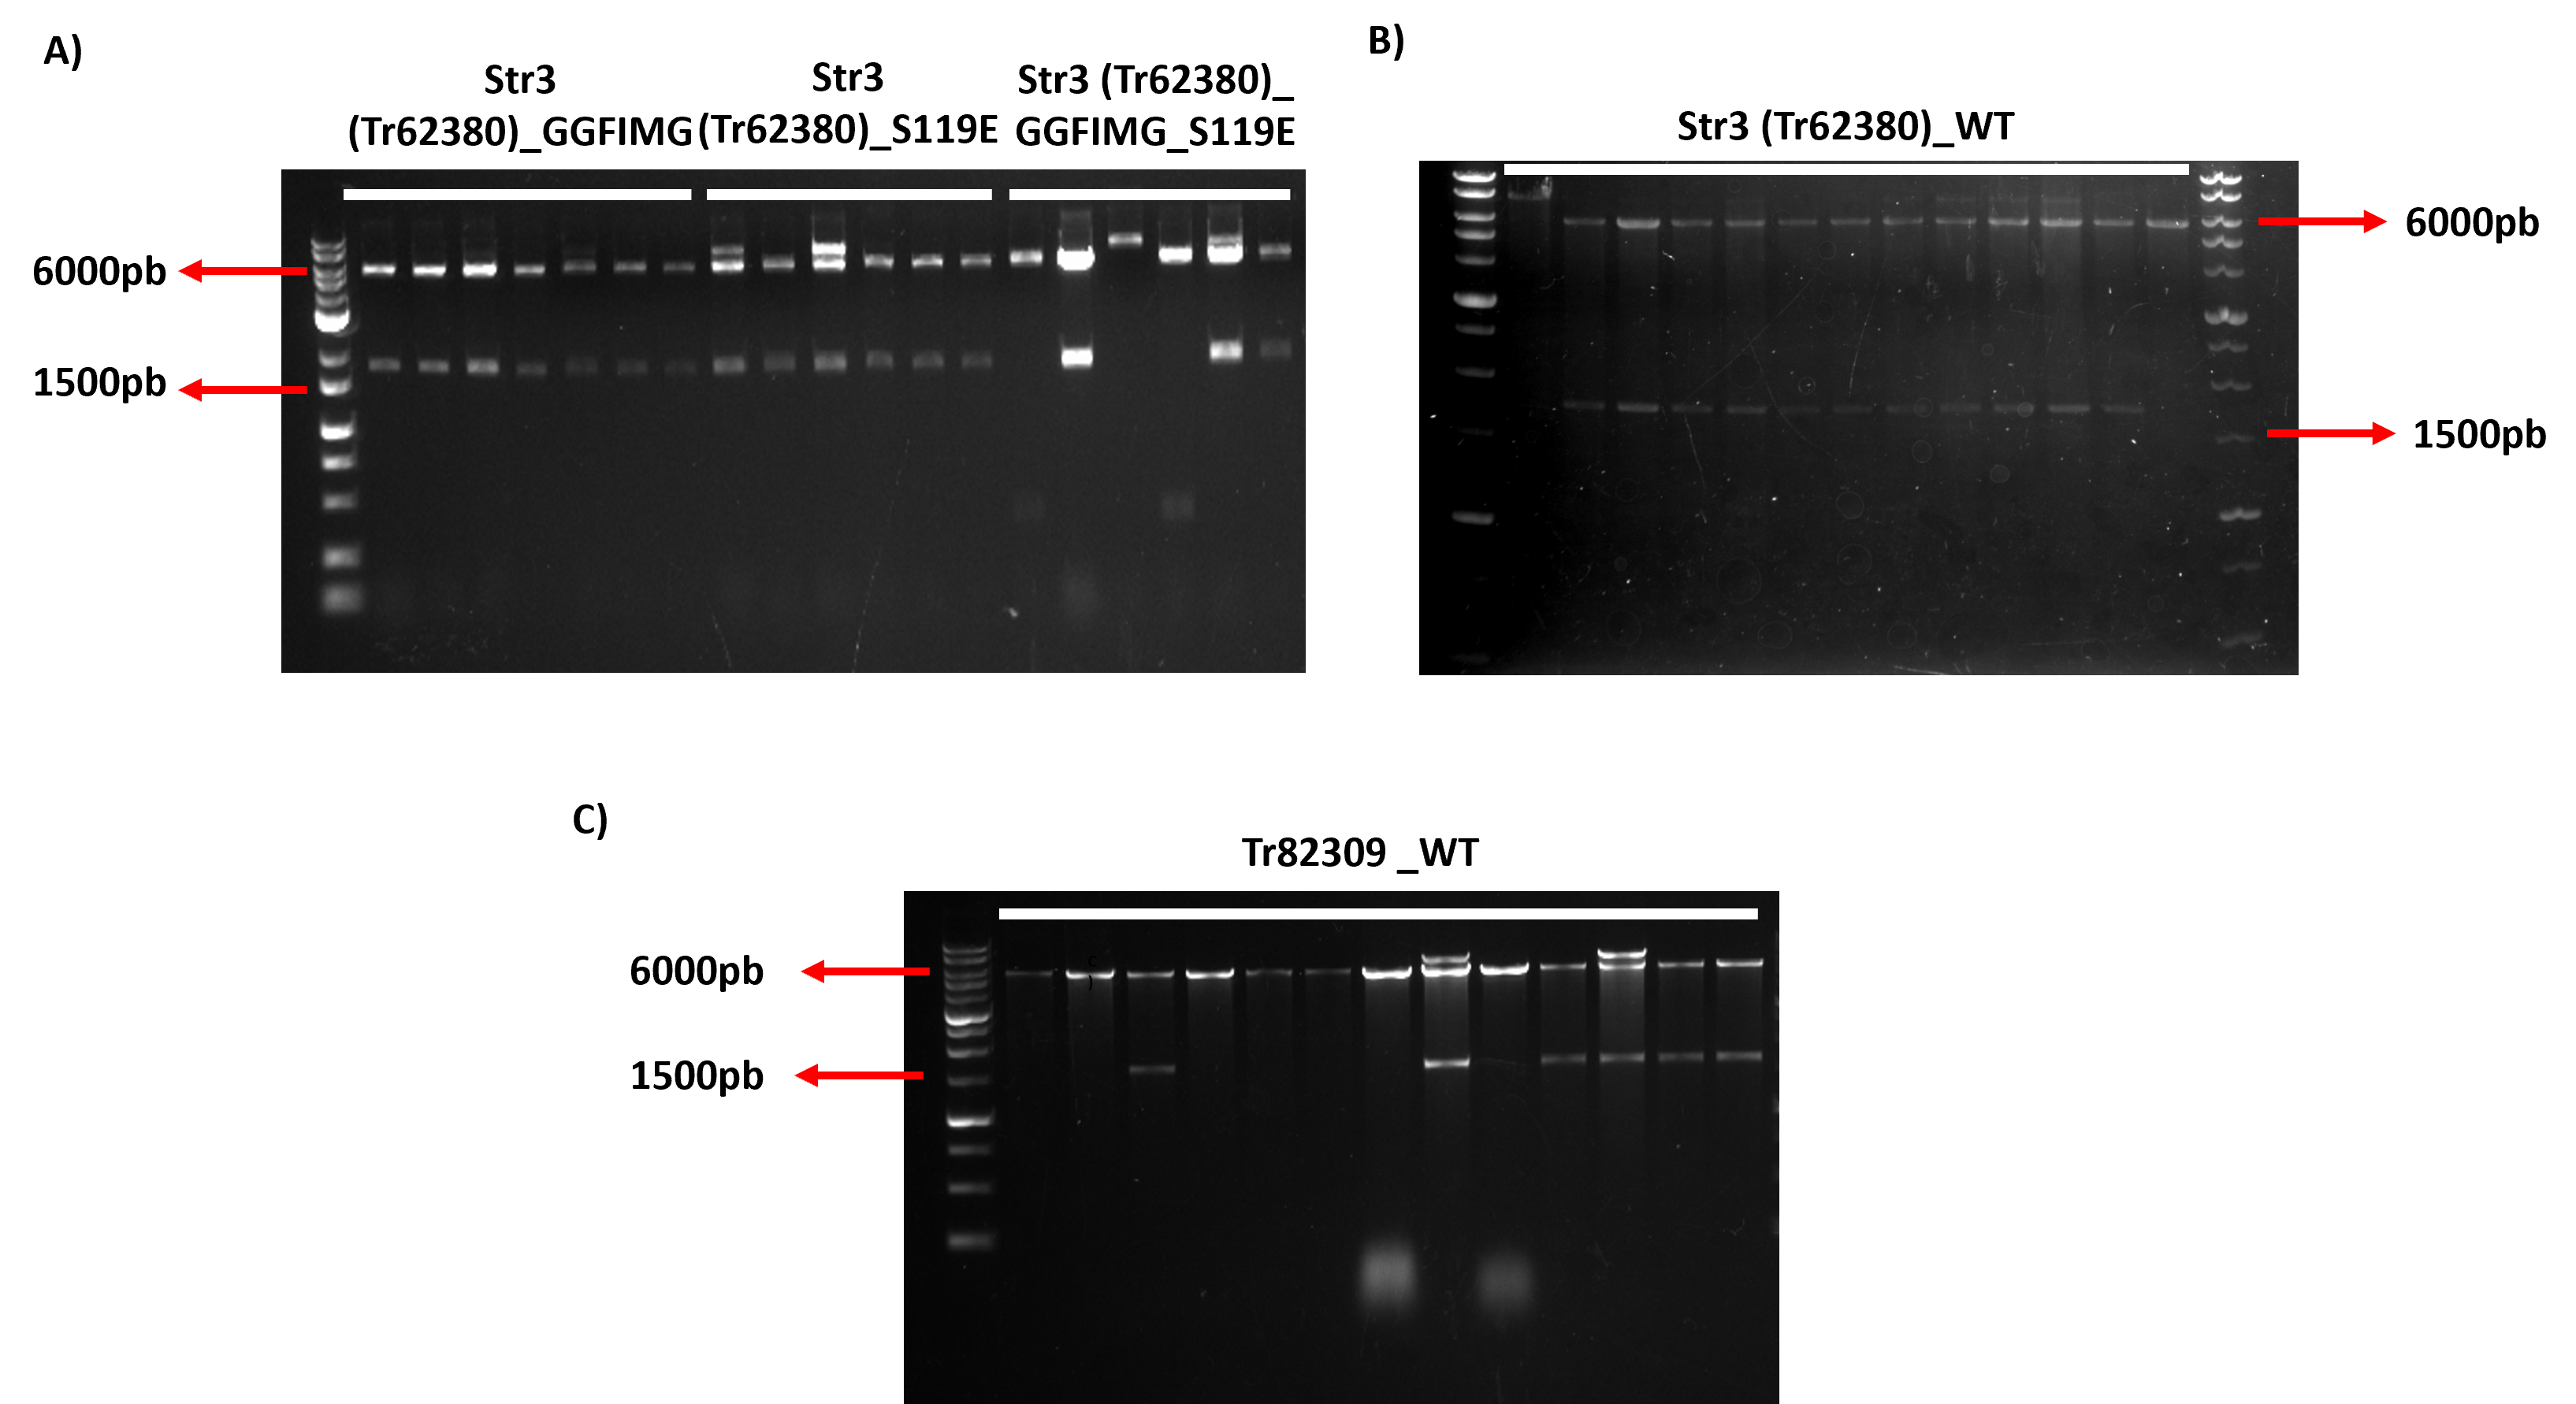
**

**Figure S6 –** Digestion of constructed expression cassettes. A) Expression cassettes digested with SmaI and BcuI of transporters with Str3 mutations (Tr62380). B) Expression cassettes digested with Str3 *Sma*I and *Bcu*I (Tr62380). C) Expression cassettes digested with *Sma*I and *Bcu*I of Tr82309.

S7:

**
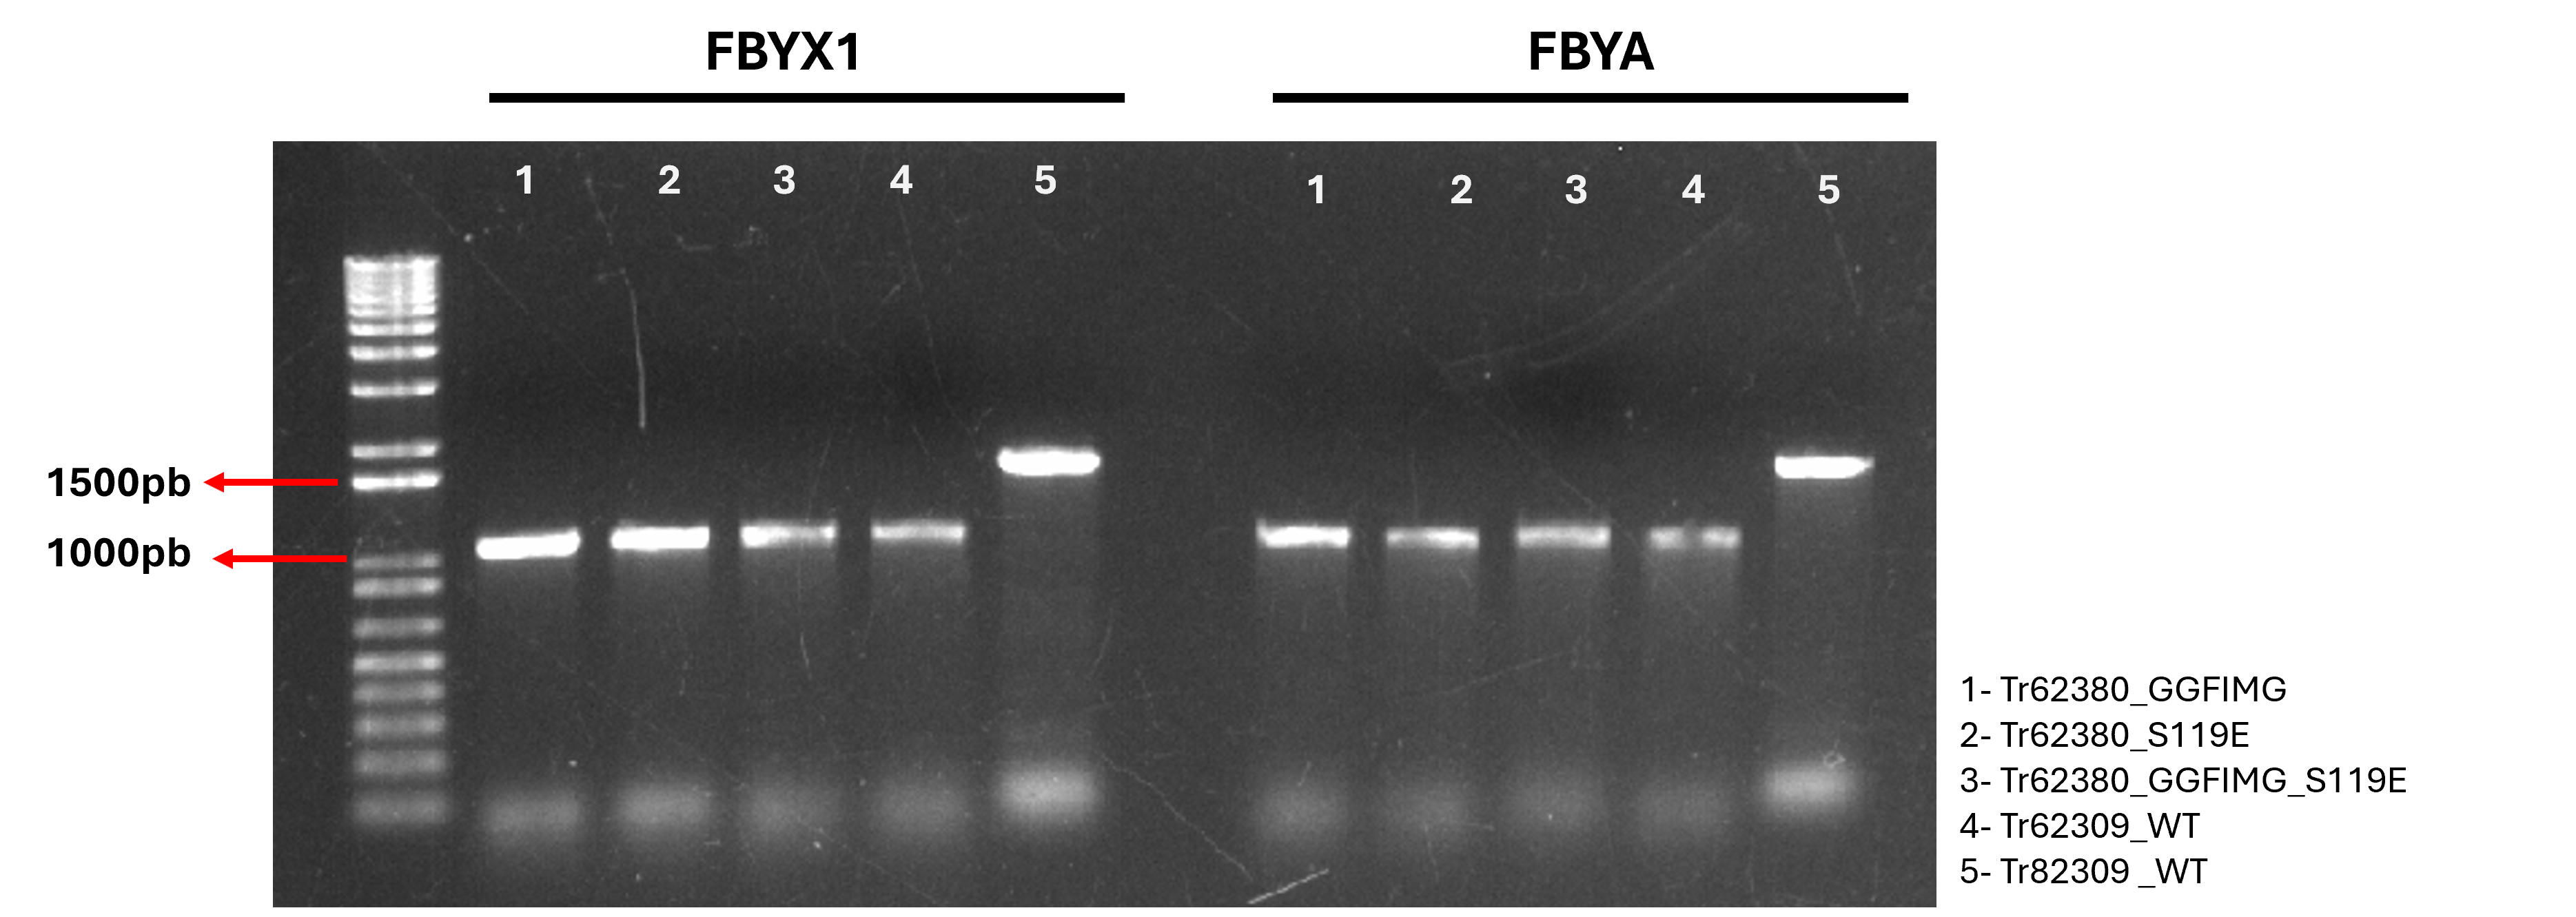
**

**Figure S7 –** PCR of expression cassettes after transformation into *S. cerevisiae* FBYX1 and FBYA strains.

S8:

**
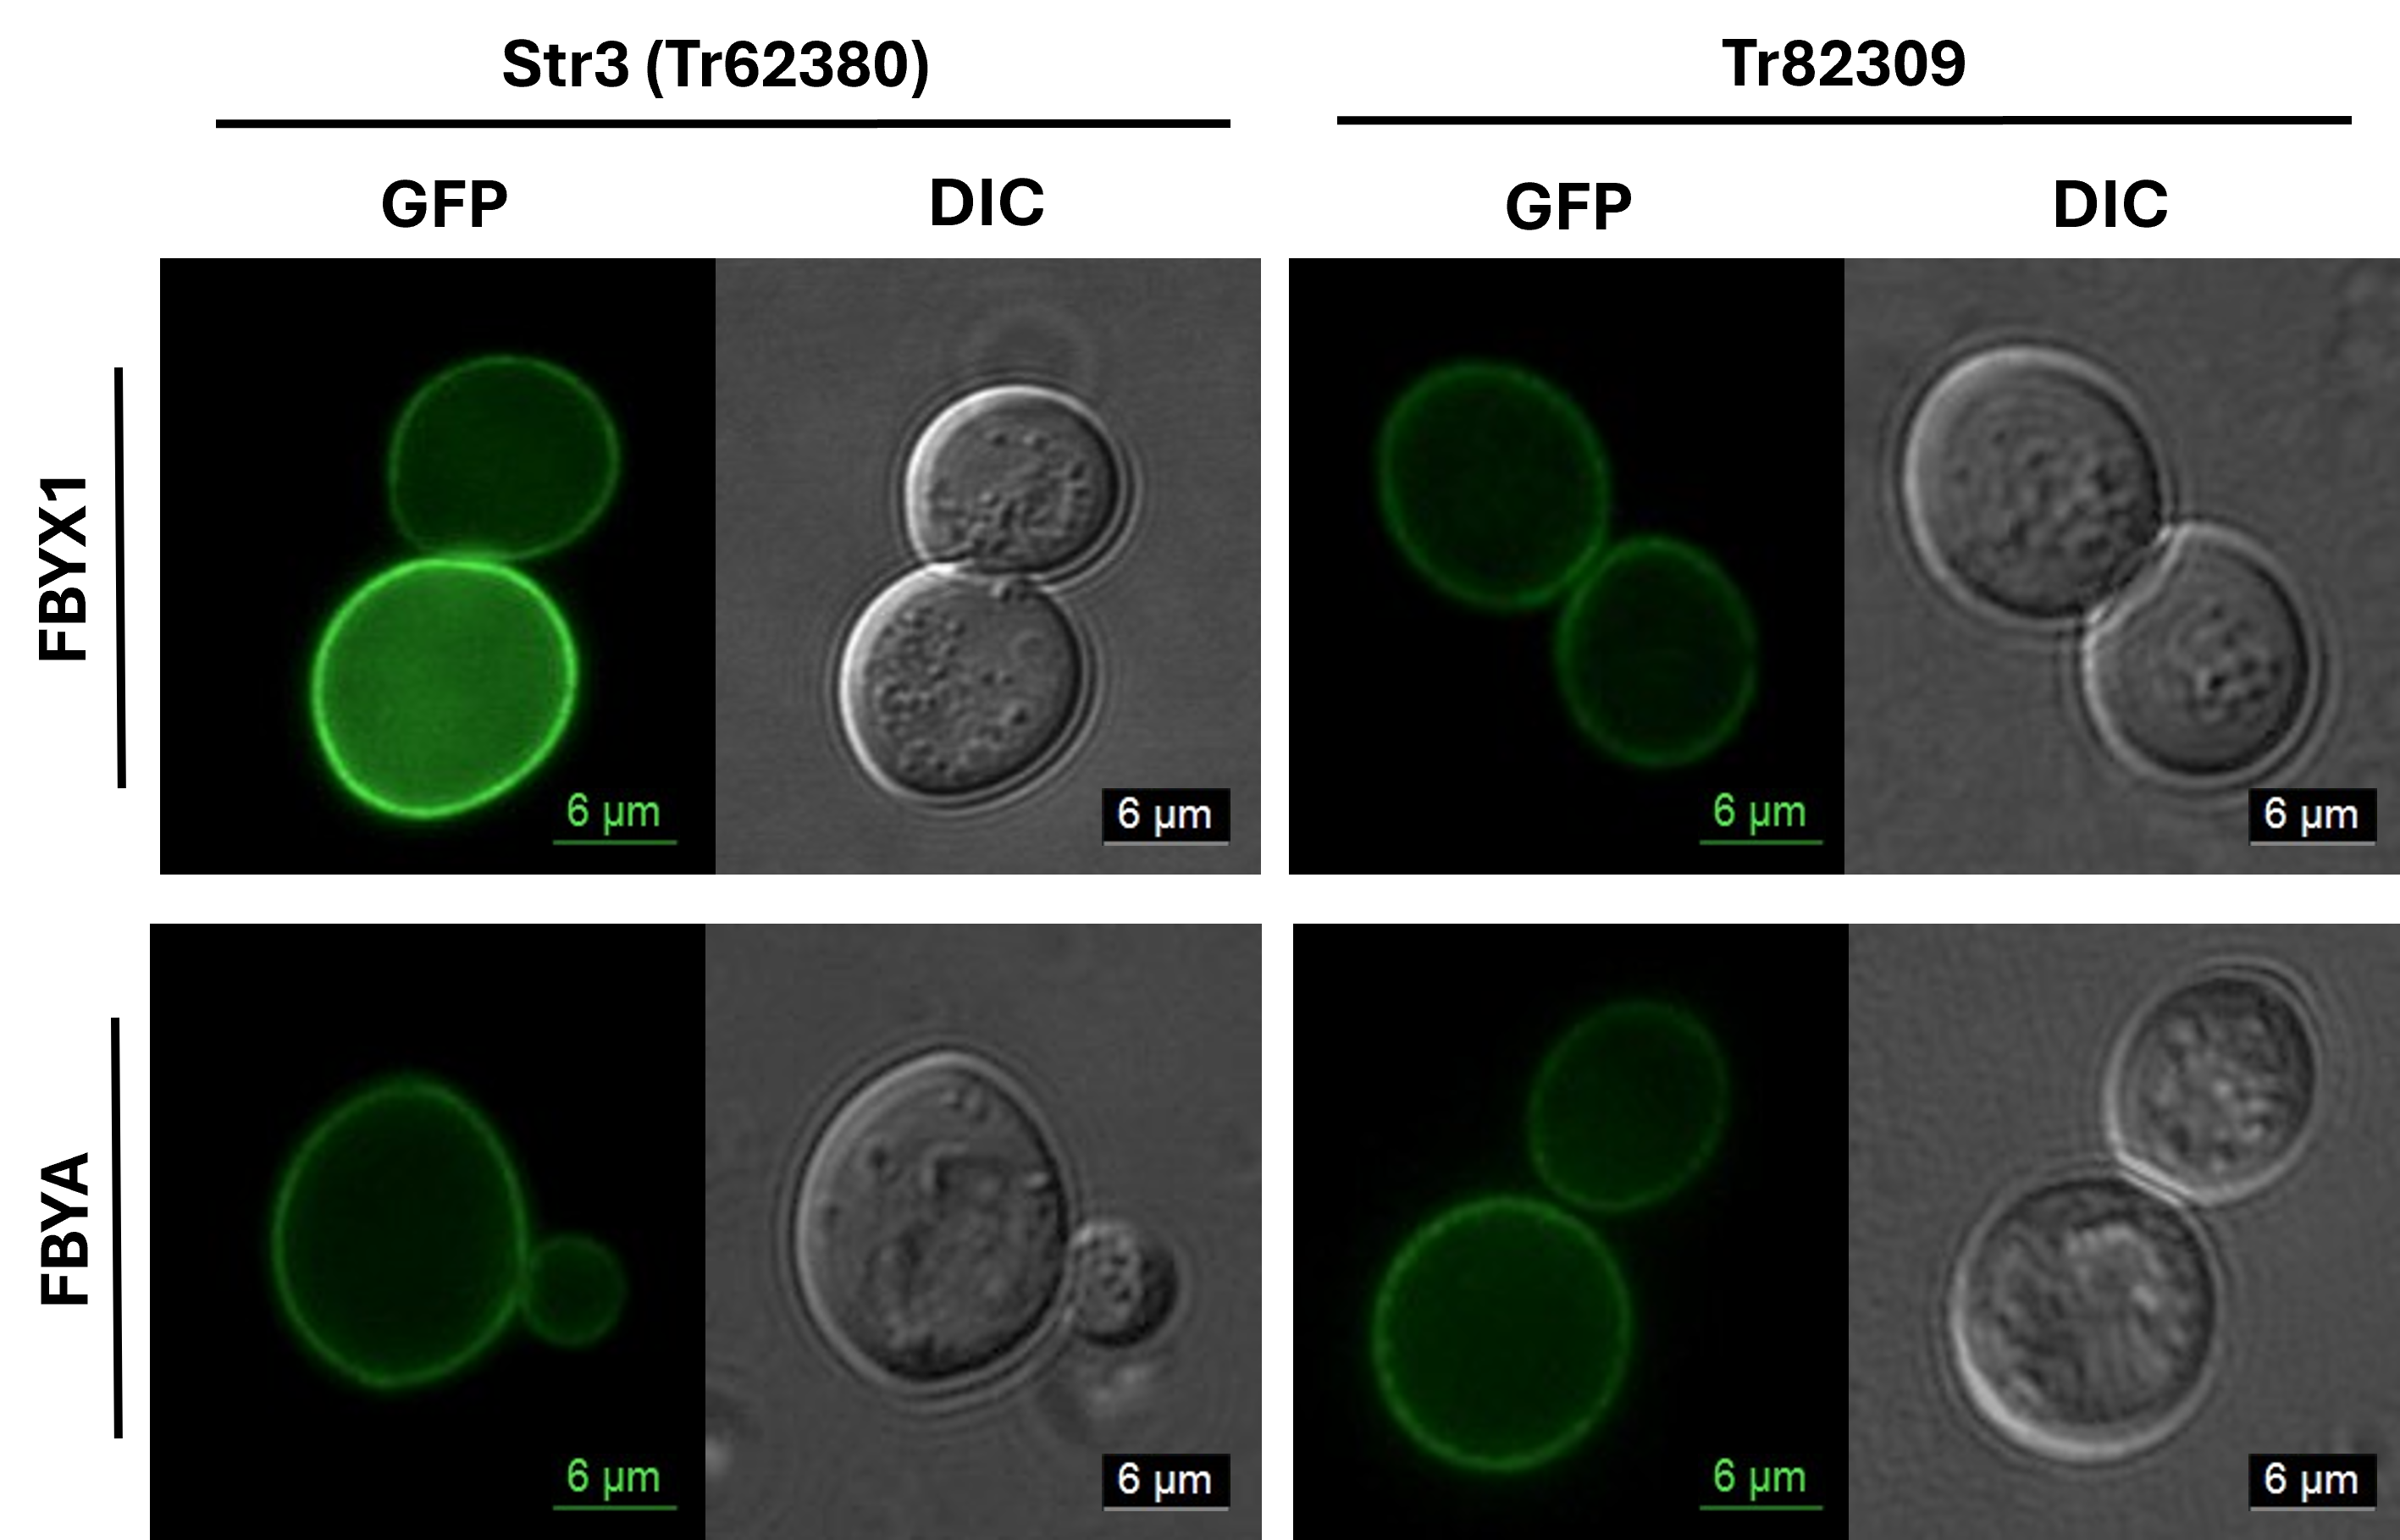
**

**Figure S8 –** Fluorescence microscopy of FBYX1 and FBYA cell lines expressing Str3 (Tr62380) and Tr82309 cassettes fused to GFP.
